# Supplementary material
Source: HighWire-hosted journal article supplement (https://jitc.bmj.com/content/11/4/e006392)
Supplement: inline-supplementary-material-1 [file inline-supplementary-material-1.pdf]

## **Supplemental methods**

### **Section I: MIFlowCyt Document**

### **Section II: Cell Interaction Analysis**

## Section I: MIFlowCyt Document

### 1. Experiment Overview

**1.1. Purpose:** The goal of these studies was to evaluate lymphoid populations within renal cell carcinoma (RCC) patient tumors following radiation treatment as previously described (Singh et al. Clinical Cancer Research, 2017). Based on the findings of increased clonality of T cells in irradiated RCC (Chow et al. PNAS, 2020), we hypothesized that radiation increases levels of activated and proliferating CD8<sup>+</sup> T cells in tumor microenvironment.

**1.2. Keywords:** Renal Cell Carcinoma, High-dimensional flow cytometry, Lymphocytes, Radiation

**1.3. Experiment Variables:** Six nephrectomy only (control) RCC patient tumor samples were compared to five radiation treated patient tumors (nephrectomy four weeks post radiation).

#### 1.4. Organization:

**1.4.1. Name:** Roswell Park Comprehensive Cancer Center

**1.4.2. Address:** Roswell Park Comprehensive Cancer Center, Elm and Carlton Streets, Buffalo, NY, 14263

#### 1.5. Primary Contact:

**1.5.1. Name:** Jason Muhitch

**1.5.2. Email Address:** [jason.muhitch@roswellpark.org](mailto:jason.muhitch@roswellpark.org)

**1.6. Date:** The first tumor sample was collected on July 11, 2013. Final analysis of spectral flow cytometry CD8 data was completed in February 2023.

**1.7. Conclusions:** We identified increased levels of four distinct T cell populations in RCC patient tumor that had been treated with radiation therapy. Two of these populations showed increased levels of markers for exhaustion and proliferation.

**1.8. Quality Control Measures:** Antibodies used in the assay were titrated and saturating concentrations were used. Pilot experiments were performed prior to the main assay to validate the functionality of the all the antibodies in the panel using PBMCs and tumor samples. The Cytex Aurora instrument was QC daily using SpectraFlo® QC Beads (Cytex; Cat #N7-97355) to adjust laser performance based on baseline settings, laser delay, and to align height and area scaling factors for optimal signal resolution to ensure consistent performance was achieved daily.

### 2. Flow Sample/Specimen Details

#### 2.1. Sample/Specimen Material Description : Renal cell carcinoma patient tumors with or without

radiation treatment were resected, processed to single cell suspension, and cryopreserved. Preserved samples were thawed and used for flow cytometry analysis. Sample source, patient age, gender, phenotype, and treatment

| SI No | Sample Description     | Source       | Organism            | Age | Gender | Phenotype Tumor Grade | Treatment      |
|-------|------------------------|--------------|---------------------|-----|--------|-----------------------|----------------|
| 1     | Single cell suspension | ccRCC tumors | <i>Homo sapiens</i> | 53  | F      | 3                     | None           |
| 2     | Single cell suspension | ccRCC tumors | <i>Homo sapiens</i> | 63  | M      | 3A                    | None           |
| 3     | Single cell suspension | ccRCC tumors | <i>Homo sapiens</i> | 61  | F      | 1B                    | None           |
| 4     | Single cell suspension | ccRCC tumors | <i>Homo sapiens</i> | 55  | M      | 2B                    | None           |
| 5     | Single cell suspension | ccRCC tumors | <i>Homo sapiens</i> | 53  | M      | 3                     | None           |
| 6     | Single cell suspension | ccRCC tumors | <i>Homo sapiens</i> | 70  | M      | 1B                    | None           |
| 7     | Single cell suspension | ccRCC tumors | <i>Homo sapiens</i> | 53  | M      | 2A                    | 15Gy Radiation |
| 8     | Single cell suspension | ccRCC tumors | <i>Homo sapiens</i> | 67  | M      | 3A                    | 15Gy Radiation |
| 9     | Single cell suspension | ccRCC tumors | <i>Homo sapiens</i> | 67  | M      | 3A                    | 15Gy Radiation |
| 10    | Single cell suspension | ccRCC tumors | <i>Homo sapiens</i> | 62  | M      | 3A                    | 15Gy Radiation |
| 11    | Single cell suspension | ccRCC tumors | <i>Homo sapiens</i> | 57  | F      | 2A                    | 15Gy Radiation |

ccRCC: clear cell Renal Cell Carcinoma

are described in the table.

**2.2. Sample Characteristics:** Renal cell carcinoma tumors are heavily infiltrated by immune cells. Evaluation of patient RCC tumors by mass cytometry has shown large cohorts of lymphocytes and myeloid populations.

**2.3. Sample Treatment(s) Description:** Patients received radiation dose (15Gy) as previously described (Singh et al. *Clinical Cancer Research*, 2017). Tumors were resected 4 weeks post radiation and processed to single cell suspension via enzymatic digestion prior to cryopreservation as previously described (Chow et al. *PNAS*, 2020). Single cell suspensions from non-irradiated patient tumors were used as controls.

**2.4. Fluorescence Reagent(s) Description:** Fluorescent reagent information (characteristic being measured, analyte, analyte detector, analyte reporter, clone, manufacturer, catalog number and dilution used) is described in the table.

| SI No | Characteristic being measured | Analyte   | Analyte detector (antibody) | Analyte reporter (fluorochrome) | Clone    | Supplier     | Catalog     | Dilution |
|-------|-------------------------------|-----------|-----------------------------|---------------------------------|----------|--------------|-------------|----------|
| 1     | Cell surface protein          | CCR5      | Anti-CCR5                   | BUV395                          | 2D7      | BD           | 565224      | 1 in 50  |
| 2     | Cell surface protein          | Live/Dead | L/D Blue Stain              | LIVE/DEAD™ Blue                 |          | ThermoFisher | L34962      | 1 in 500 |
| 3     | Cell surface protein          | CD31      | Anti-CD31                   | BUV496                          | L1331.1  | BD           | 749833      | 1 in 200 |
| 4     | Cell surface protein          | CD14      | Anti-CD14                   | BUV563                          | MφP9     | BD           | 741441      | 1 in 100 |
| 5     | Cell surface protein          | CD261     | Anti-CD261                  | BUV615                          | S35-934  | BD           | 752308      | 1 in 50  |
| 6     | Cell surface protein          | CD11c     | Anti-CD11c                  | BUV661                          | B-ly6    | BD           | 612967      | 1 in 200 |
| 7     | Cell surface protein          | CD56      | Anti-CD56                   | BUV737                          | NCAM16.2 | BD           | 612766      | 1 in 200 |
| 8     | Cell surface protein          | CD45RO    | Anti-CD45RO                 | BUV805                          | UCHL1    | BD           | 748367      | 1 in 100 |
| 9     | Intracellular protein         | CD68      | Anti-CD68                   | BV421                           | Y1/82A   | BD           | 564943      | 1 in 50  |
| 10    | Cell surface protein          | CD27      | Anti-CD27                   | SB436                           | O323     | ThermoFisher | 62-0279-42  | 1 in 200 |
| 11    | Cell surface protein          | CD8       | Anti-CD8                    | Pacific Blue                    | SK1      | Biolegend    | 980906      | 1 in 200 |
| 12    | Intracellular protein         | KI67      | Anti-KI67                   | BV480                           | B56      | BD           | 566109      | 1 in 50  |
| 13    | Cell surface protein          | CD204     | Anti-CD204                  | BV510                           | U23-56   | BD           | 742439      | 1 in 50  |
| 14    | Cell surface protein          | CD4       | Anti-CD4                    | Pacific Orange                  | RPA-T4   | ThermoFisher | 79-0049-42  | 1 in 100 |
| 15    | Cell surface protein          | CD28      | Anti-CD28                   | BV605                           | CD28.2   | Biolegend    | 302967      | 1 in 100 |
| 16    | Cell surface protein          | CXCR3     | Anti-CXCR3                  | BV650                           | G025H7   | Biolegend    | 353729      | 1 in 50  |
| 17    | Cell surface protein          | CCR6      | Anti-CCR6                   | BV711                           | G034E3   | Biolegend    | 353435      | 1 in 100 |
| 18    | Cell surface protein          | CCR4      | Anti-CCR4                   | BV750                           | 1G1      | BD           | 746980      | 1 in 50  |
| 19    | Cell surface protein          | CCR7      | Anti-CCR7                   | BV785                           | G043H7   | Biolegend    | 353229      | 1 in 50  |
| 20    | Cell surface protein          | CD57      | Anti-CD57                   | FITC                            | NK-1     | BD           | 555619      | 1 in 200 |
| 21    | Cell surface protein          | CD3       | Anti-CD3                    | Spark Blue 550                  | SK-7     | Biolegend    | 344852      | 1 in 100 |
| 22    | Cell surface protein          | CD45      | Anti-CD45                   | Nova Blue 610                   | 2D1      | ThermoFisher | H005T03B05  | 1 in 100 |
| 23    | Cell surface protein          | PD1       | Anti-PD1                    | PerCP-Cy5.5                     | EH12.1   | BD           | 561273      | 1 in 50  |
| 24    | Cell surface protein          | LAG3      | Anti-LAG3                   | PerCP-eFluor710                 | 3DS223H  | ThermoFisher | 46-2239-42  | 1 in 50  |
| 25    | Intracellular protein         | TOX       | Anti-TOX                    | PE                              | REA473   | Miltenyi     | 130-120-716 | 1 in 50  |
| 26    | Cell surface protein          | TIGIT     | Anti-TIGIT                  | PE/Dazzle 594                   | A15153G  | Biolegend    | 372716      | 1 in 50  |
| 27    | Cell surface protein          | CD25      | Anti-CD25                   | PE-Fire/640                     | M-A251   | Biolegend    | 356148      | 1 in 50  |
| 28    | Cell surface protein          | CD33      | Anti-CD33                   | PE-Cy5                          | HIM3-4   | ThermoFisher | 15-0339-42  | 1 in 100 |
| 29    | Cell surface protein          | CD127     | Anti-CD127                  | PE-Fire 700                     | A019D5   | Biolegend    | 351366      | 1 in 100 |
| 30    | Cell surface protein          | CD253     | Anti-CD253                  | PE Cy7                          | RIK-2    | Biolegend    | 308216      | 1 in 50  |
| 31    | Cell surface protein          | TIM3      | Anti-TIM3                   | APC                             | F38-2E2  | ThermoFisher | 62-3109-42  | 1 in 50  |
| 32    | Cell surface protein          | CD45RA    | Anti-CD45RA                 | Spark NIR 685                   | HI100    | Biolegend    | 304168      | 1 in 200 |
| 33    | Cell surface protein          | CX3CR1    | Anti-CX3CR1                 | R718                            | G025H7   | Biolegend    | 353730      | 1 in 50  |
| 34    | Cell surface protein          | CD38      | Anti-CD38                   | APC-eFluor780                   | HIT2     | ThermoFisher | 47-0389-42  | 1 in 200 |
| 35    | Cell surface protein          | HLA-DR    | Anti-HLADR                  | APC/Fire 810                    | L243     | Biolegend    | 307674      | 1 in 100 |

### 3. Instrument Details

**3.1. Instrument Manufacturer:** Cytex Biosciences

**3.2. Instrument Model:** Cytex™ Aurora

#### 3.3.1. Instrument Configuration and Settings:

**3.3.1.1. Flow cells:** Clean Flow Cell, 12x75 mm polystyrene and polypropylene tubes

**3.3.1.2. Fluidics Information:** Sample flow rates – Low (15µL/min), Medium (30µL/min), High (60µL/min).

#### 3.3.2. Light Source(s)

**3.3.2.1. Light source type:** Lasers

**3.3.2.2. Light source excitatory wavelength:** 335 nm, 405 nm, 488 nm, 561 nm, 640 nm

**3.3.2.3. Light source power at excitatory wavelength:** 335 nm (20 mW), 405 nm (100 mW), 488 nm (50 mW), 561 nm (50 mW), 640 nm (80 mW)

**3.3.2.4. Light source beam:** Flat-Top laser beam profile with narrow vertical beam height optimized for small particle detection.

#### 3.3.3. Excitation optics configuration:

Ultraviolet detector module: 16 channels unevenly spaced bandwidth from 365-829 nm.

Violet detector module: 16 channels unevenly spaced bandwidth from 420-829 nm.

Blue detector module: 14 channels unevenly spaced bandwidth from 498-829 nm.

Yellow-Green detector module: 10 channels unevenly spaced bandwidth from 567-829 nm.

Red detector module: 8 channels unevenly spaced bandwidth from 652-829 nm.

#### 3.3.4. Optical Filters:

FSC: high-performance semiconductor detector with 488nm bandpass filter

SSC: two high-performance semiconductor detectors with 405nm and 488nm bandpass filters

**3.3.5. Optical detectors:** Proprietary high sensitivity Coarse Wavelength Division Multiplexing (CWDM) semiconductor array per laser.

#### 3.4 Other Information:

POWER: 100-140 VAC, 15A or 200-250 VAC, 10A

HEAT DISSIPATION: 500 W with all solid-state lasers

TEMPERATURE: 15–28°C

HUMIDITY: 20%-85% relative non-condensing

AIR FILTERING: No excessive dust or smoke

LIGHTING: No special requirements

## 4. Data Analysis Details

**4.1. List-mode Data File:** Both Raw and Unmixed FCS files for 11 patients will be available for download at ImmPort under access code SDY1998 post acceptance.

**4.2. Compensation Details:** Live spectral unmixing was performed using SPECTROFLO SOFTWARE during sample acquisition. A second compensation step was performed using FCS Express 7. Compensation matrix is provided with the FCS datafiles.

### 4.3. Data Transformation Details:

**4.3.1. Purpose of Data Transformation:** FlowSOM clustering was used to performed unsupervised clustering for the purpose of identifying subsets within CD8+ cells. tSNE analysis (dimensionality reduction) was done to visualize these clusters on a 2D plot. Both analyses were performed using the pipeline feature of FCS Express 7.

**4.3.2. Data Transformation Description:** The steps used in the pipeline are described below.

**FlowSOM:** To identify CD8+ subsets, all CD8+ cells from each unmixed patient data files were first exported out as new FCS files. Gating strategy is highlighted in supplementary figure 2a. 10000 events from each CD8+ data files were then concatenated (using FCS Express) to generate one FCS file with all patient data combined. This file was then used to perform FlowSOM and tSNE analyses.

FlowSOM hierarchical clustering to identify subpopulations was performed using CCR4, CCR5, CCR6, CCR7, CD25, CD27, CD28, CD38, CD45-RA, CD45-RO, CD56, CD57, CD127, CXCR3, CX3CR1, HLA-DR, KI67, LAG3, PD-1, TIGIT, TIM3, and TOX markers.

**New Scaling:** The specified parameters were scaled using the new scaling step. Additional 0-1 scaling step was performed to visualize the data on one scale.

**Batch Self-Organizing Map:** 0 to 1 scaled parameter for each marker were used to run the batch self-organizing map step. The following settings were used:

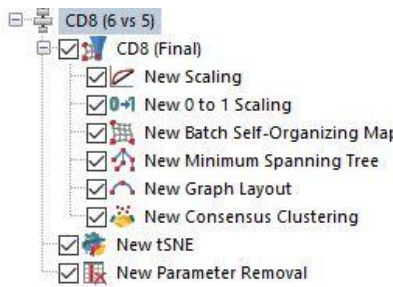

**Transformation Options**

Add Meta-Clustering as New Parameter  
 Add Meta-Clustering To Selected Parameter

**Coarse Training Options**

Number of Cycles:   
 Neighborhood Spread: Initial  Final

**Fine-Tune Training Options**

Number of Cycles:   
 Neighborhood Spread: Initial  Final   
 Automatic Neighborhood Spread

SOM 2D Grid: Width  Height   
 New Parameter Name:

**Cluster Centroids Initialization Method**

Random  
 Random Cells

**Training Decay Function**

Asymptotic  
 Linear

**2D Grid Neighborhood Function**

Gaussian  
 Boxcar

**2D Grid Distance Metric**

Euclidean (L2-norm)  
 Chebyshev (Linf-norm)

**Minimum spanning tree** and **Graph Layout** were generated with default software set up.

**Consensus clustering** was performed with following settings:

| Transformation Options                                                        |                                  |
|-------------------------------------------------------------------------------|----------------------------------|
| <input checked="" type="checkbox"/> Add Meta-Clustering as New Parameter      |                                  |
| <input checked="" type="checkbox"/> Add Meta-Clustering To Selected Parameter |                                  |
| Number of Clusters                                                            | 15                               |
| Sampling Fraction                                                             | 0.9                              |
| Number of Samplings                                                           | 100                              |
| New Parameter Name                                                            | Consensus Clustering Assignments |
| Clustering Algorithms                                                         |                                  |
| <input type="radio"/> KMeans                                                  |                                  |
| <input checked="" type="radio"/> Hierarchical                                 |                                  |
| Generate New Random Seed                                                      | 6                                |

**tSNE:** 0 to 1 scaled **values** of specified parameters were used to generate tSNE plots. Following settings were used to generate the plots:

| Transformation Options                                    |      |
|-----------------------------------------------------------|------|
| Suffix for transformed parameters                         |      |
| tSNE Method To Use                                        |      |
| <input type="radio"/> Exact tSNE                          |      |
| <input checked="" type="radio"/> Barnes-Hut Approximation |      |
| Amount of Approximation (Applies only to Barnes-Hut)      | 0.50 |
| Perplexity                                                | 50   |
| Number of Iterations                                      | 5000 |
| <input type="checkbox"/> Use Opt-SNE                      |      |
| Generate New Random Seed                                  | 6    |

**4.3.3. Other relevant data:** All spectral analyses was performed using FCS Express7 software package (De 517 Novo Software, version 7.08.0018)

#### 4.4. Gating (Data Filtering) Details:

**4.4.1. Gate Description:** Gating strategy to export out CD8<sup>+</sup> T cell events from all patient files is shown in supplemental figure 2a.

**4.4.2. Gate Statistics:** Frequencies for each sub-cluster for each patient is highlighted in supplemental table 4.

**4.4.3. Gate Boundaries:** Gates for different clusters on tSNE plots were generated using consensus clustering assignments identified via FlowSOM.

**Section II: Cell interaction analysis**

Relevant target cell genes for responses of interest were identified from established pathways and relevant publications (KEGG 04612, Antigen processing and presentation; KEGG 04210, Apoptosis; KEGG 05140, Leishmaniasis; Dror et al. 2007)<sup>35</sup>; second, potential ligands from source cells were identified by a ranked by Pearson correlation calculated based on cross referencing top-expressed source cell genes with a ligand-target-matrix<sup>20</sup>; potential target cell receptors were identified by cross-referencing top-expressed target cell genes with a ligand-receptor-network<sup>20</sup> of established physical interactors of predicted source cell ligands.
